# Supplementary material for: Protective Effects of Testosterone on Presynaptic Terminals against Oligomericβ-Amyloid Peptide in Primary Culture of Hippocampal Neurons
Source: Hindawi journal article supplement (doi:10.1155/2014/103906), 2014-01-01
Supplement: f1 [file 103906.f1.pdf]

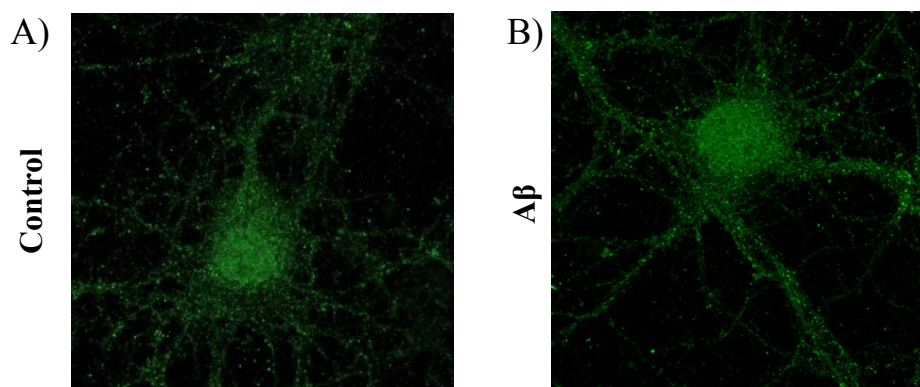

Supplementary Figure 1

Lau et al., 2014

**Supplementary Figure 1. Oligomeric A $\beta$  did not induce changes in the expression of PSD95 in primary hippocampal neurons.** Primary cultures of hippocampal neurons were exposure to 5  $\mu$ M oligomeric A $\beta$  for 24 h. Neurons were stained with PSD95 antibody. (A) Control, (B) 5  $\mu$ M A $\beta$  for 24 h.
